# Supplementary material for: Circularly polarized luminescence enlargement from crystals to oriented films of enantiopure 2D hybrid perovskites
Source: Royal Society of Chemistry journal article supplement (doi:10.1039/d3cc01739g), 2023-01-01
Supplement: d3cc01739g1.pdf [file d3cc01739g1.pdf]

## Supplementary Information

### **Circularly polarized luminescence enlargement from crystals to oriented films of enantiopure 2D hybrid perovskite**

*Xuan-Hui Zhao,<sup>a,b</sup> Na-Na Li,<sup>a,c</sup> Jing Peng,<sup>a</sup> Jun Xu,<sup>a</sup> Peng Luo,<sup>a</sup> Xi-Yan Dong<sup>a,b\*</sup> and Xiaozong Hu<sup>b\*</sup>*

\*Correspondence: [dongxiyan0720@hpu.edu.cn](mailto:dongxiyan0720@hpu.edu.cn) (X. Y. Dong), [huxz@zzu.edu.cn](mailto:huxz@zzu.edu.cn) (X. Hu)

## Experimental section

**Reagents and Materials Used.** (R)-1-4-fluorophenethylamine (**R-FMBA**, 98%) and (S)-1-(4-fluorophenethylamine (**S-FMBA**, 98%) were purchased from Bidepharm Ltd. (Shanghai, China). The *rac*-**F MBA** is obtained by mixing **R-FMBA** and **S-FMBA** in equal amount Lead(II) bromide ( $\text{PbBr}_2$ , 99%) was purchased from Aladdin Ltd. (Shanghai, China). Hydrobromic acid (HBr), dichloromethane (DCM) were purchased from Kermel Ltd. (Tianjin, China).

**Materials Preparation.** Synthesis and purification of  $(\text{R-FMBA})_2\text{PbBr}_4$  (**R-1**) and  $(\text{S-FMBA})_2\text{PbBr}_4$  (**S-1**). Lead (II) bromide (183.5 mg, 0.5 mmol) and **R-FMBA** (140 mg, 1 mmol) were mixed and dissolved in HBr (10 mL). The mixture was heated and stirred to form a transparent precursor solution, and after the volatilization of the solvent, **R-1** flake crystals were obtained. The obtained crystals were thoroughly washed with DCM and then dried in vacuo, and pure **R-1** was obtained. The method for obtaining **S-1** is similar to that of **R-1**. Synthesis and purification of and  $(\text{rac-FMBA})_8\text{Pb}_3\text{Br}_{14}\cdot 2\text{H}_2\text{O}$  (**rac-1**). **R-FMBA** (70 mg, 0.05 mmol) and **S-FMBA** (70 mg, 0.05 mmol) are mixed in equal amounts with  $\text{PbBr}_2$  (183.5 mg, 0.5 mmol) and dissolved in HBr, heated and stirred until clear to obtain acicular crystal **rac-1**. The purification process is the same as that of **R-1**.

**Thin films Preparation.** Dissolve 40 mg of **R-1** or **S-1** crystals in 100  $\mu\text{L}$  of DMF, drop the solution onto the quartz plate on the spin coater (acetone ultrasonic for 15 min, ethanol ultrasonic for 15 min, dried and treated with plasma cleaning machine for 15 min). Turn on the spin coater for 1000 r/min for 10 s and 3000 r/min for the 20 s immediately. After annealing at 90  $^\circ\text{C}$  for 10 min, uniform **R-1** or **S-1** films were obtained. It is worth noting that films of different sizes perpendicular to the bottom can be obtained after annealing in the above operation.

**Material Characterizations.** Crystallographic data collection and refinement of the structure. Single-crystal X-ray diffraction measurements of **R-1**, **S-1** and **rac-1** were performed on a Rigaku XtaLAB Pro diffractometer. Data collection and reduction were

performed using the program CrysAlisPro.<sup>1</sup> All the structures were solved with direct methods (SHELXS)<sup>2</sup> and refined by full-matrix least-squares on F<sup>2</sup> using OLEX2,<sup>3</sup> which utilizes the SHELXL-2015 module.<sup>4</sup> All the atoms were refined anisotropically. Hydrogen atoms were placed in calculated positions refined using idealized geometries and assigned fixed isotropic displacement parameters. The crystal structures are visualized by DIAMOND 3.2. Powder X-ray diffraction (PXRD) patterns of **R-1**, **S-1** and **rac-1** were collected at room temperature in the air using an X'Pert PRO diffractometer. Thermogravimetry analyses (TGA) were performed on a TA Q50 system under N<sub>2</sub> atmosphere (flow rate = 60 mL/min) in the temperature range 30 - 800 °C at a heating rate of 10 °C/min. UV-visible diffuse reflectance spectra of samples were recorded at room temperature in the range of 240 - 800 nm using a UH4150 spectrophotometer equipped with an integrating sphere. The room temperature steady-state spectroscopy, time-resolved photoluminescence (PL), temperature-dependent emission spectra and photoluminescence quantum yield were measured on the HORIBA FluoroLog-3 fluorescence spectrometer. The circular dichroism (CD) spectra of powder samples were measured on JASCO J-1500 by potassium bromide tablet pressing method. Circularly polarized luminescence (CPL) spectra of powder samples were measured on a JASCO CPL-300.

## Supporting Figures

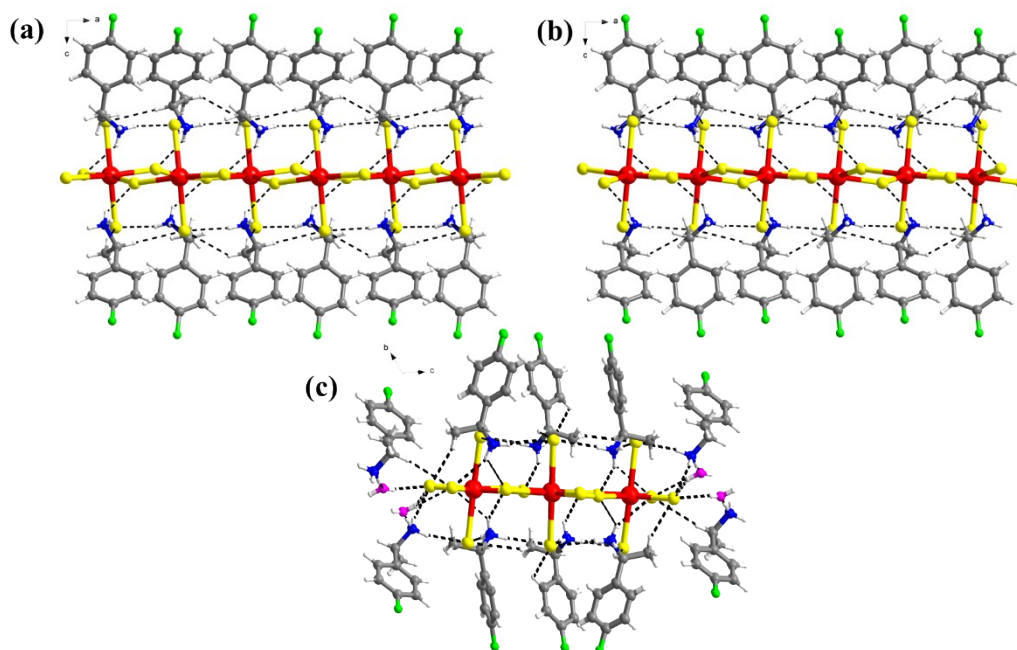

**Fig. S1.** Hydrogen bonding interactions of Br atoms with FMBA<sup>+</sup> spacer cations in (a) *R*-1, (b) *S*-1 and (c) *rac*-1.

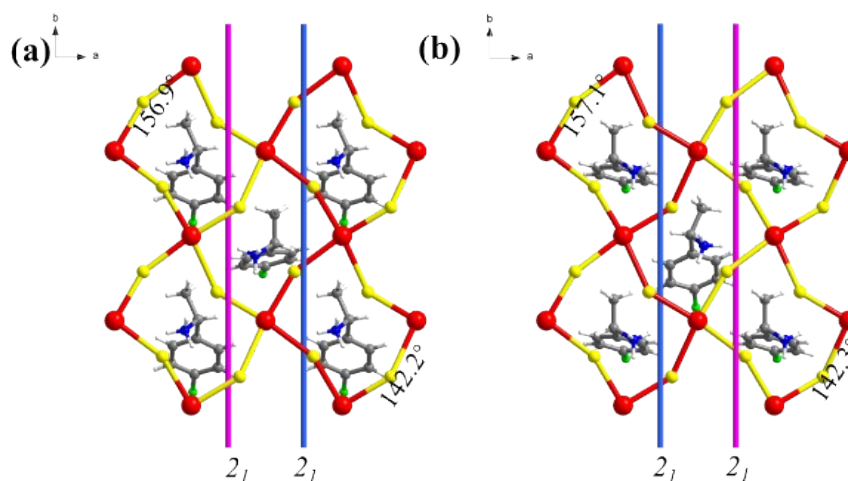

**Fig. S2** (a) The plane view of [PbBr<sub>6</sub>] the layers in (a) *R*-1 and (b) *S*-1 show two different equatorial Pb–Br–Pb bond angles, and the 2<sub>1</sub>- axis that exists in the helical arrangement of different Br atoms on the equatorial plane (pink and blue).

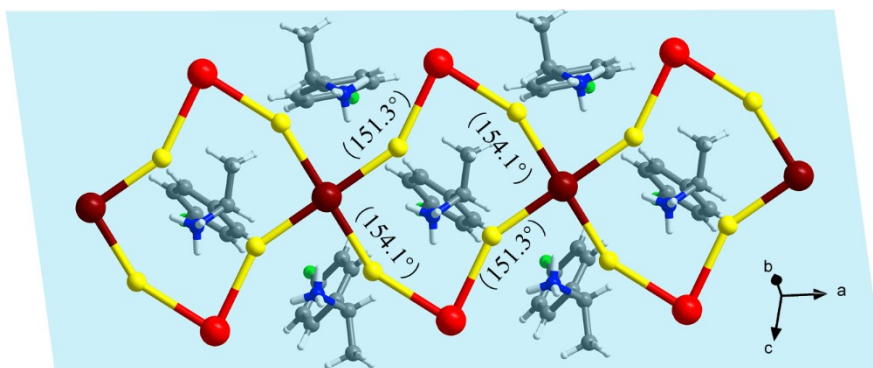

**Fig. S3.** Schematic diagram of the inorganic layer part of *rac-1*.

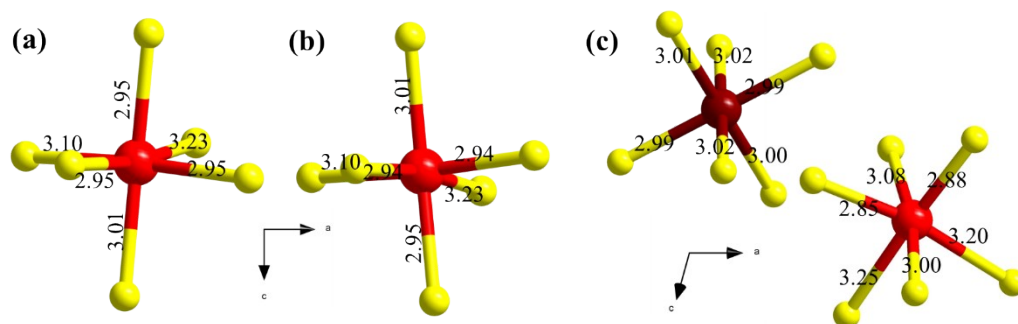

**Fig. S4**  $[\text{PbBr}_6]^{4-}$  octahedron in (a) *R-1*, (b) *S-1*, (c) *rac-1* (dark red: Pb1; red: Pb2).

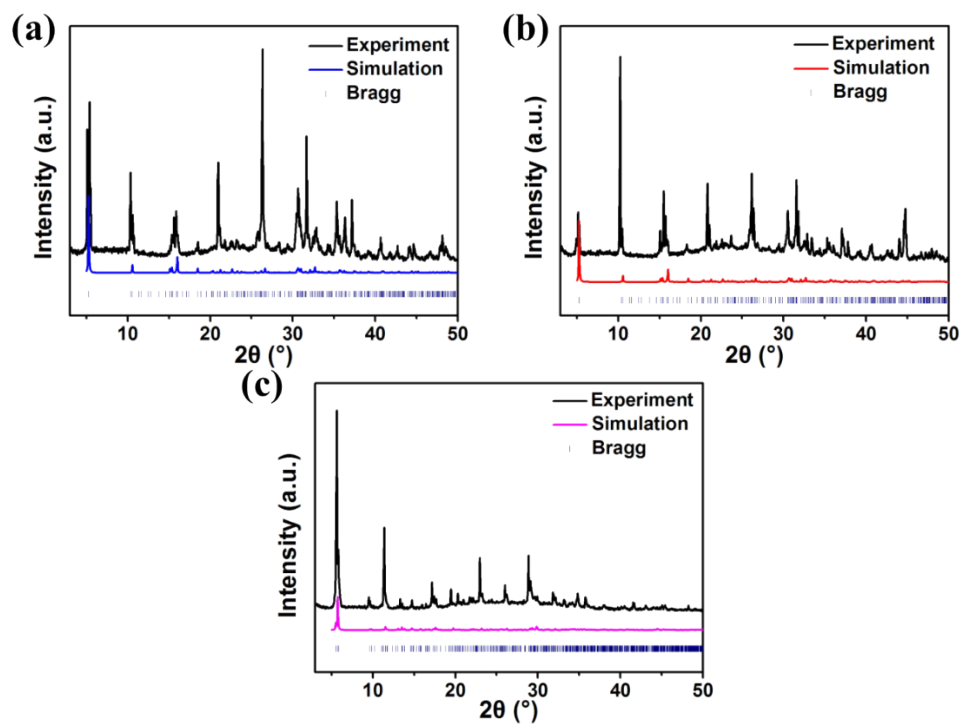

Fig. S5. PXRD patterns of our as-synthesized (a) *R*-1, (b) *S*-1, and (c) *rac*-1.

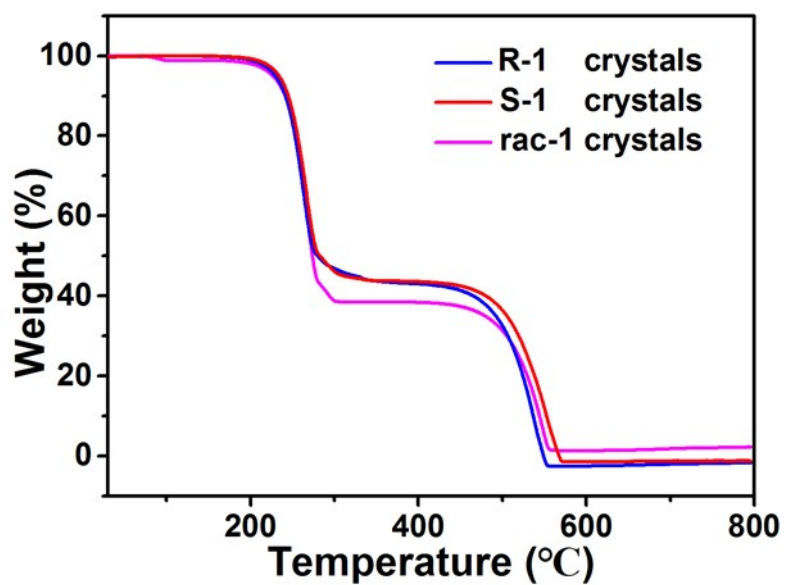

Fig. S6. TGA curve of *R*-1, *S*-1 and *rac*-1 crystals.

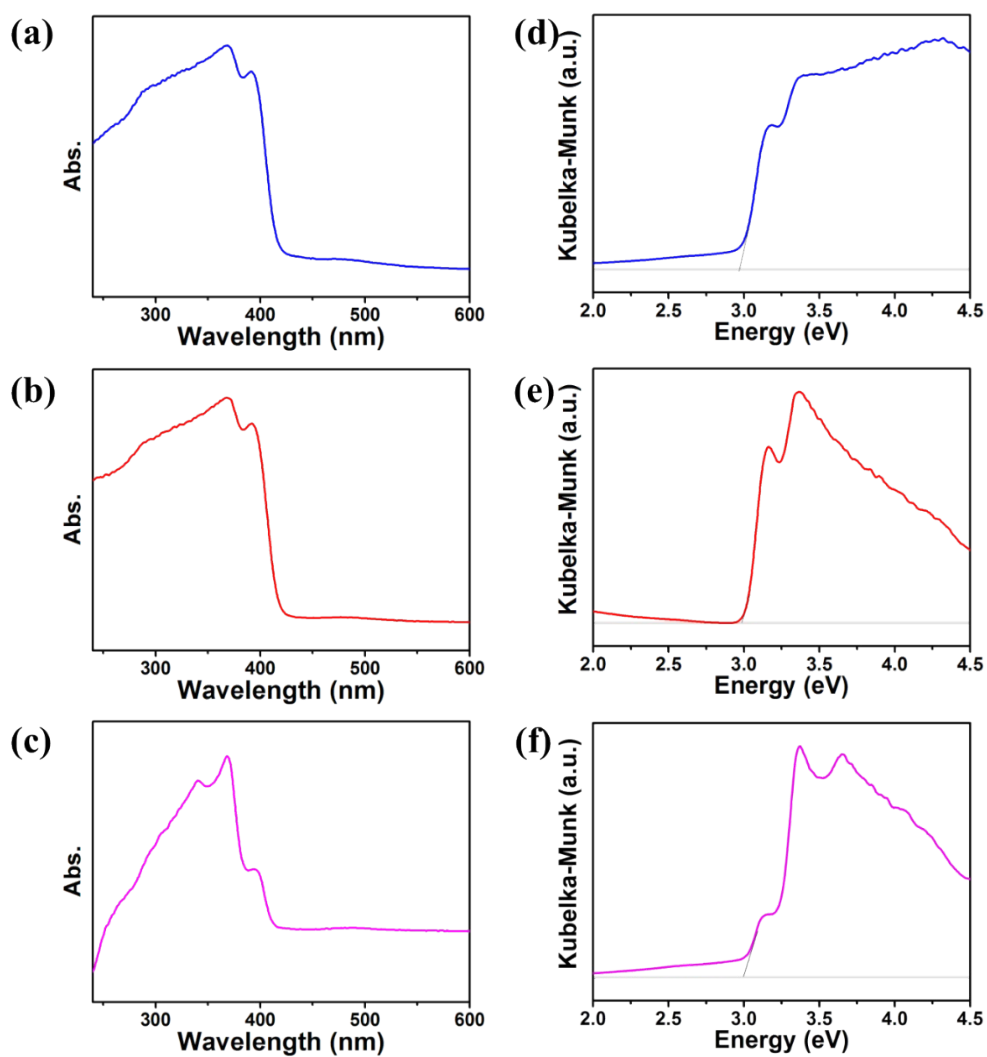

**Fig. S7.** The solid UV-vis spectra of (a) *R-1* (b) *S-1*, and (c) *rac-1*. The optical band gap diagrams of (d) *R-1*, (e) *S-1* and (f) *rac-1* are simulated according to the solid UV-Vis absorption and the Tacu equation.

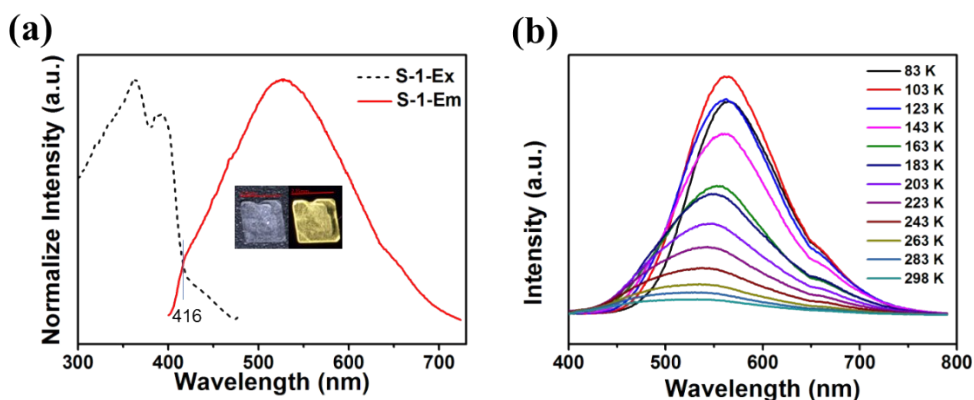

**Fig. S8.** (a) Excitation and luminescence profiles of *S-1*. Inset is a *S-1* fluorescent photograph. (b) Temperature-dependent PL spectra of *S-1*.

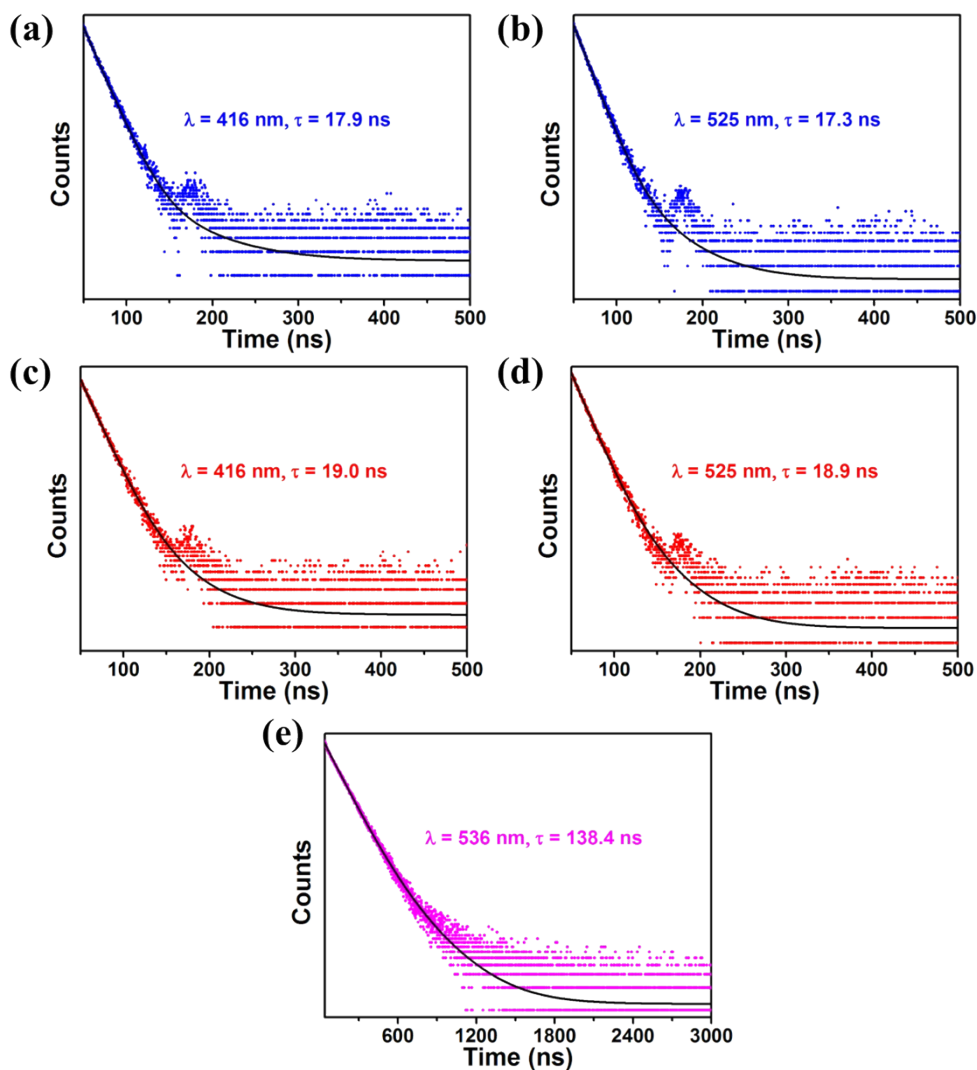

**Fig. S9.** Decay curves of (a, b) *R-1*, (c, d) *S-1* and (e) *rac-1* at 298 K.



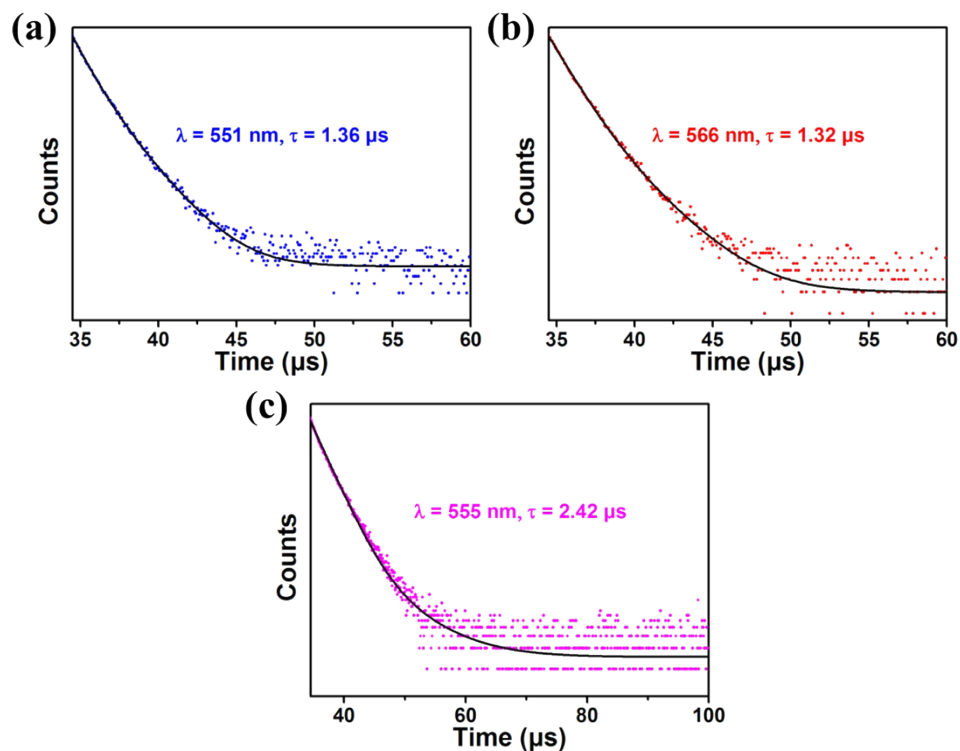

Fig. S10. Photoluminescent decay curves of (a) *R-1*, (b) *S-1* and (c) *rac-1* at 83 K.

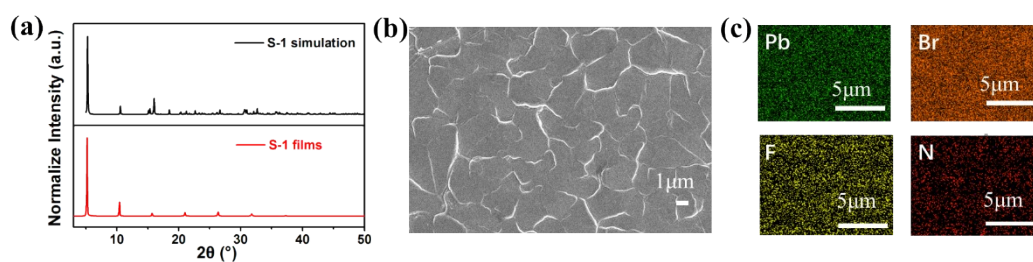

Fig. S11. (a) XRD pattern of *S-1* thin film and simulation pattern of corresponding single crystals. (b) SEM photograph of *S-1* films. (c) Mapping diagram of partial element distribution in specific places of *S-1* films.

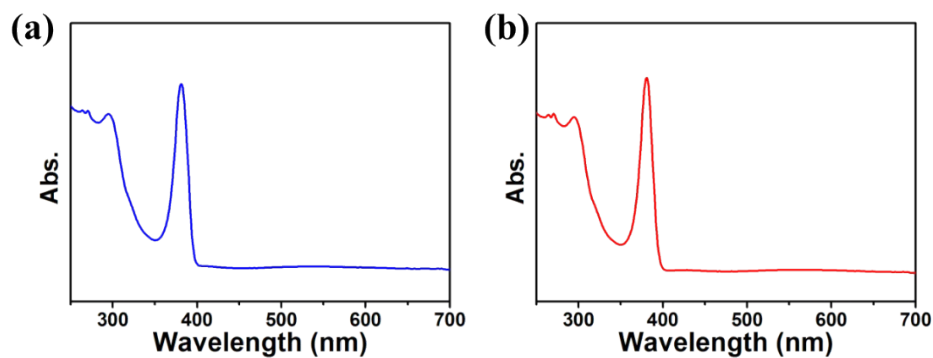

Fig. S12. UV-Vis absorption of (a) *R-1*, (b) *S-1* films.

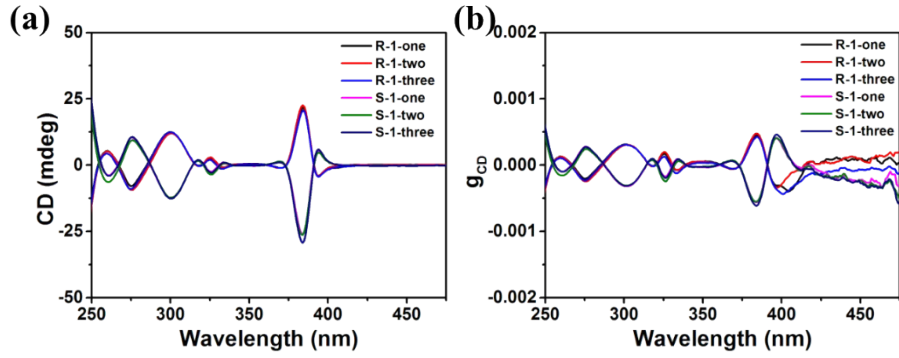

**Fig. S13.** (a) CD signals and (b)  $g_{CD}$  of *R-1* and *S-1* thin films with different sizes.

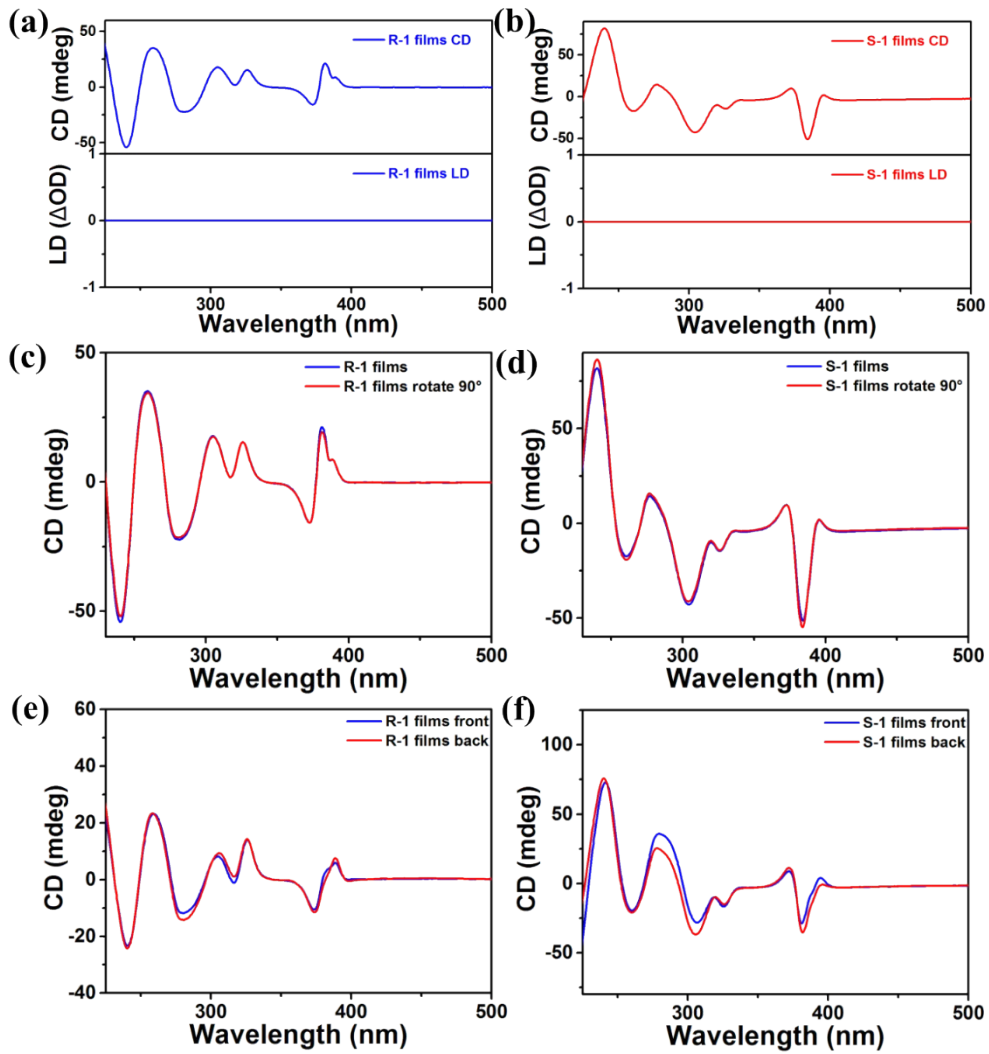

**Fig. S14.** (a, b) CD and LD spectra of *R/S-1* thin films. (c, d) CD signals from different azimuth ( $90^\circ$ ) of *R/S-1* thin films. (e, f) CD signals under flip of *R/S-1* thin films.

## Supporting Tables

**Table S1. Crystal data and structure refinement for *R*-1, *S*-1 and *rac*-1**

| Compound                                              | <i>R</i> -1                                                                      | <i>S</i> -1                                                                      | <i>rac</i> -1                                                                                                 |
|-------------------------------------------------------|----------------------------------------------------------------------------------|----------------------------------------------------------------------------------|---------------------------------------------------------------------------------------------------------------|
| Empirical formula                                     | C <sub>16</sub> H <sub>22</sub> Br <sub>4</sub> F <sub>2</sub> N <sub>2</sub> Pb | C <sub>16</sub> H <sub>22</sub> Br <sub>4</sub> F <sub>2</sub> N <sub>2</sub> Pb | C <sub>64</sub> H <sub>92</sub> Br <sub>14</sub> F <sub>8</sub> N <sub>8</sub> O <sub>2</sub> Pb <sub>3</sub> |
| Formula weight                                        | 807.18                                                                           | 807.18                                                                           | 2897.76                                                                                                       |
| Temperature / K                                       | 200.00                                                                           | 200.00                                                                           | 296                                                                                                           |
| Crystal system                                        | orthorhombic                                                                     | orthorhombic                                                                     | triclinic                                                                                                     |
| Space group                                           | <i>P</i> 2 <sub>1</sub> 2 <sub>1</sub> 2 <sub>1</sub>                            | <i>P</i> 2 <sub>1</sub> 2 <sub>1</sub> 2 <sub>1</sub>                            | <i>P</i> -1                                                                                                   |
| <i>a</i> / Å                                          | 7.84310(10)                                                                      | 7.84030(10)                                                                      | 8.1612(2)                                                                                                     |
| <i>b</i> / Å                                          | 8.79770(10)                                                                      | 8.79580(10)                                                                      | 17.5034(4)                                                                                                    |
| <i>c</i> / Å                                          | 33.4343(4)                                                                       | 33.4329(4)                                                                       | 18.6108(5)                                                                                                    |
| $\alpha$ / °                                          | 90                                                                               | 90                                                                               | 115.7360(10)                                                                                                  |
| $\beta$ / °                                           | 90                                                                               | 90                                                                               | 102.2250(10)                                                                                                  |
| $\gamma$ / °                                          | 90                                                                               | 90                                                                               | 95.0980(10)                                                                                                   |
| <i>V</i> / Å <sup>3</sup>                             | 2307.01(5)                                                                       | 2305.59(5)                                                                       | 2290.62(10)                                                                                                   |
| <i>Z</i>                                              | 4                                                                                | 4                                                                                | 1                                                                                                             |
| $\rho_{calc}$ g/cm <sup>3</sup>                       | 2.324                                                                            | 2.325                                                                            | 2.101                                                                                                         |
| $\mu$ / mm <sup>-1</sup>                              | 22.504                                                                           | 22.518                                                                           | 11.662                                                                                                        |
| F(000)                                                | 1488.0                                                                           | 1488.0                                                                           | 1356.0                                                                                                        |
| 2 $\Theta$ range for data collection / °              | 10.398 to 132.996                                                                | 10.4 to 132.984                                                                  | 4.426 to 55.17                                                                                                |
| Reflections collected                                 | 7114                                                                             | 6740                                                                             | 133130                                                                                                        |
| Data/restraints/parameters                            | 3815/0/230                                                                       | 3744/0/231                                                                       | 7908/1/456                                                                                                    |
| Goodness-of-fit on F <sup>2</sup>                     | 1.027                                                                            | 1.065                                                                            | 1.012                                                                                                         |
| Final R indexes [ <i>I</i> ≥ 2 $\sigma$ ( <i>I</i> )] | R <sub>1</sub> = 0.0310, wR <sub>2</sub> = 0.0726                                | R <sub>1</sub> = 0.0373, wR <sub>2</sub> = 0.1019                                | R <sub>1</sub> = 0.0281, wR <sub>2</sub> = 0.0565                                                             |
| Final R indexes [all data]                            | R <sub>1</sub> = 0.0344, wR <sub>2</sub> = 0.0741                                | R <sub>1</sub> = 0.0380, wR <sub>2</sub> = 0.1025                                | R <sub>1</sub> = 0.0468, wR <sub>2</sub> = 0.0616                                                             |
| Flack parameter                                       | -0.028(8)                                                                        | -0.013(10)                                                                       | -                                                                                                             |
| CCDC                                                  | 2252841                                                                          | 2252843                                                                          | 2253014                                                                                                       |

***R*-1:** <sup>1</sup>2-X, -1/2+Y, 3/2-Z; <sup>2</sup>1-X, -1/2+Y, 3/2-Z; <sup>3</sup>2-X, 1/2+Y, 3/2-Z; <sup>4</sup>1-X, 1/2+Y, 3/2-Z

***S*-1:** <sup>1</sup>-X, 1/2+Y, 1/2-Z; <sup>2</sup>1-X, 1/2+Y, 1/2-Z; <sup>3</sup>-X, -1/2+Y, 1/2-Z; <sup>4</sup>1-X, -1/2+Y, 1/2-Z

***rac*-1:** <sup>1</sup>2-X, -1-Y, 1-Z; <sup>2</sup>-1+X, +Y, +Z

**Table S2. The main bond length in *R*-1, *S*-1, and *rac*-1.**

| <i>R</i> -1          |            | <i>S</i> -1          |            |
|----------------------|------------|----------------------|------------|
| Bond                 | (Å)        | Bond                 | (Å)        |
| Pb1-Br1              | 3.0158(11) | Pb1-Br1              | 2.9483(11) |
| Pb1-Br2              | 2.9502(11) | Pb1-Br1 <sup>1</sup> | 3.2329(12) |
| Pb1-Br2 <sup>1</sup> | 3.2333(10) | Pb1-Br2              | 2.9530(11) |
| Pb1-Br3              | 2.9516(11) | Pb1-Br3              | 3.0170(11) |
| Pb1-Br4              | 2.9497(10) | Pb1-Br4 <sup>2</sup> | 3.1080(11) |
| Pb1-Br4 <sup>2</sup> | 3.1077(10) | Pb1-Br4              | 2.9462(11) |

  

| <i>rac</i> -1        |           |                      |           |
|----------------------|-----------|----------------------|-----------|
| Bond                 | (Å)       | Bond                 | (Å)       |
| Pb1-Br1 <sup>1</sup> | 3.0164(4) | Pb2-Br2 <sup>2</sup> | 3.2508(5) |
| Pb1-Br1              | 3.0164(4) | Pb2-Br3              | 3.2005(5) |
| Pb1-Br2 <sup>1</sup> | 2.9934(4) | Pb2-Br4              | 3.0792(5) |
| Pb1-Br2              | 2.9934(4) | Pb2-Br5              | 2.8792(5) |
| Pb1-Br3              | 3.0117(4) | Pb2-Br6              | 2.8455(5) |
| Pb1-Br3 <sup>1</sup> | 3.0117(4) | Pb2-Br7              | 3.0061(5) |

**Table S3. The major bond angles in *R*-1, *S*-1, and *rac*-1.**

| <i>R</i> -1                            |            | <i>S</i> -1                            |            |
|----------------------------------------|------------|----------------------------------------|------------|
| Angle                                  | (°)        | Angle                                  | (°)        |
| Br1-Pb1-Br2 <sup>1</sup>               | 103.03(3)  | Br1-Pb1-Br1 <sup>1</sup>               | 96.711(16) |
| Br1-Pb1-Br4 <sup>2</sup>               | 90.58(3)   | Br1-Pb1-Br2                            | 87.28(3)   |
| Br2-Pb1-Br1                            | 85.77(3)   | Br1-Pb1-Br3                            | 85.80(3)   |
| Br2-Pb1-Br2 <sup>1</sup>               | 96.713(14) | Br1-Pb1-Br4 <sup>2</sup>               | 172.40(3)  |
| Br2-Pb1-Br3                            | 87.27(3)   | Br2-Pb1-Br1 <sup>1</sup>               | 88.84(3)   |
| Br2-Pb1-Br4 <sup>2</sup>               | 172.43(3)  | Br2-Pb1-Br3                            | 166.85(4)  |
| Br3-Pb1-Br1                            | 166.85(3)  | Br2-Pb1-Br4 <sup>2</sup>               | 97.52(3)   |
| Br3-Pb1-Br2 <sup>1</sup>               | 88.85(3)   | Br3-Pb1-Br1 <sup>1</sup>               | 103.06(3)  |
| Br3-Pb1-Br4 <sup>2</sup>               | 97.56(3)   | Br3-Pb1-Br4 <sup>2</sup>               | 90.59(3)   |
| Br4-Pb1-Br1                            | 83.40(3)   | Br4-Pb1-Br1 <sup>1</sup>               | 171.08(3)  |
| Br4-Pb1-Br2 <sup>1</sup>               | 171.08(3)  | Br4-Pb1-Br1                            | 89.91(3)   |
| Br4 <sup>2</sup> -Pb1-Br2 <sup>1</sup> | 77.64(3)   | Br4 <sup>2</sup> -Pb1-Br1 <sup>1</sup> | 77.58(3)   |
| Br4-Pb1-Br2                            | 89.87(3)   | Br4-Pb1-Br2                            | 85.51(3)   |
| Br4-Pb1-Br3                            | 85.45(3)   | Br4-Pb1-Br3                            | 83.31(3)   |
| Br4-Pb1-Br4 <sup>2</sup>               | 96.293(11) | Br4-Pb1-Br4 <sup>2</sup>               | 96.313(12) |

  

| <i>rac</i> -1                          |            |                          |             |
|----------------------------------------|------------|--------------------------|-------------|
| Angle                                  | (°)        | Angle                    | (°)         |
| Br2 <sup>1</sup> -Pb1-Br1              | 91.982(13) | Br4-Pb2-Br3              | 99.196(13)  |
| Br2-Pb1-Br1 <sup>1</sup>               | 88.020(13) | Br4-Pb2-Br5              | 90.911(15)  |
| Br2-Pb1-Br1                            | 88.017(13) | Br5-Pb2-Br2 <sup>2</sup> | 177.472(15) |
| Br2 <sup>1</sup> -Pb1-Br1 <sup>1</sup> | 91.981(13) | Br5-Pb2-Br3              | 94.202(14)  |
| Br2-Pb1-Br3 <sup>1</sup>               | 93.525(13) | Br5-Pb2-Br4              | 90.911(15)  |
| Br2-Pb1-Br3                            | 86.475(13) | Br5-Pb2-Br7              | 94.954(15)  |
| Br2 <sup>1</sup> -Pb1-Br3              | 93.524(13) | Br6-Pb2-Br2 <sup>2</sup> | 86.808(14)  |
| Br2 <sup>1</sup> -Pb1-Br3 <sup>1</sup> | 86.476(13) | Br6-Pb2-Br3              | 169.941(13) |
| Br3-Pb1-Br1 <sup>1</sup>               | 86.265(12) | Br6-Pb2-Br4              | 83.565(14)  |
| Br3 <sup>1</sup> -Pb1-Br1 <sup>1</sup> | 93.734(13) | Br6-Pb2-Br5              | 95.428(15)  |
| Br3 <sup>1</sup> -Pb1-Br1              | 86.268(12) | Br6-Pb2-Br7              | 88.780(14)  |
| Br3-Pb1-Br1                            | 93.733(12) | Br7-Pb2-Br2 <sup>2</sup> | 83.898(13)  |
| Br3-Pb2-Br2 <sup>2</sup>               | 83.507(12) | Br7-Pb2-Br3              | 87.498(13)  |
| Br4-Pb2-Br2 <sup>2</sup>               | 90.512(14) | Br7-Pb2-Br4              | 170.769(15) |

**Table S4.** Experimental hydrogen bonding parameters single crystal X-ray structures for HOIPs are studied in this work. The subscripts ‘eq’ and ‘ax’ indicate equatorial and axial directions respectively.

| <b>Compound</b>        | <b>H-bond</b>          | <b>length (Å)</b> | <b>angle at H (°)</b> |
|------------------------|------------------------|-------------------|-----------------------|
| <b><i>R</i>-1</b>      | N-H---Br <sub>eq</sub> | 2.683             | 150.22                |
|                        | N-H---Br <sub>eq</sub> | 2.694             | 128.47                |
|                        | N-H---Br <sub>ax</sub> | 2.651             | 153.74                |
|                        | N-H---Br <sub>ax</sub> | 2.647             | 162.62                |
|                        | N-H---Br <sub>ax</sub> | 2.484             | 162.62                |
|                        | N-H---Br <sub>ax</sub> | 2.543             | 165.18                |
|                        | C-H---Br <sub>ax</sub> | 2.981             | 143.79                |
|                        | C-H---Br <sub>ax</sub> | 3.084             | 139.91                |
|                        | C-H---Br <sub>ax</sub> | 2.906             | 171.26                |
| <b><i>S</i>-1</b>      | N-H---Br <sub>eq</sub> | 2.706             | 128.20                |
|                        | N-H---Br <sub>eq</sub> | 2.653             | 157.76                |
|                        | N-H---Br <sub>ax</sub> | 2.526             | 165.54                |
|                        | N-H---Br <sub>ax</sub> | 2.502             | 161.43                |
|                        | N-H---Br <sub>ax</sub> | 2.596             | 164.07                |
|                        | N-H---Br <sub>ax</sub> | 2.603             | 160.89                |
|                        | C-H---Br <sub>ax</sub> | 3.116             | 138.93                |
|                        | C-H---Br <sub>ax</sub> | 2.981             | 140.93                |
|                        | C-H---Br <sub>ax</sub> | 2.902             | 173.25                |
| <b><i>rac</i>-1</b>    | N-H---Br <sub>eq</sub> | 2.735             | 135.58                |
|                        | N-H---Br <sub>eq</sub> | 2.767             | 132.31                |
|                        | N-H---Br <sub>eq</sub> | 2.913             | 146.88                |
|                        | N-H---Br <sub>eq</sub> | 2.726             | 136.60                |
|                        | N-H---Br <sub>eq</sub> | 3.025             | 127.61                |
|                        | N-H---Br <sub>eq</sub> | 2.855             | 128.82                |
|                        | N-H---Br <sub>ax</sub> | 2.474             | 163.23                |
|                        | N-H---Br <sub>ax</sub> | 2.592             | 170.42                |
|                        | N-H---Br <sub>ax</sub> | 2.709             | 165.97                |
|                        | N-H---Br <sub>ax</sub> | 2.524             | 167.96                |
|                        | N-H---Br <sub>ax</sub> | 2.620             | 166.72                |
|                        | N-H---Br <sub>ax</sub> | 2.575             | 172.39                |
|                        | N-H---Br <sub>ax</sub> | 2.524             | 165.92                |
|                        | C-H---Br <sub>ax</sub> | 3.113             | 136.90                |
|                        | C-H---Br <sub>ax</sub> | 3.098             | 123.58                |
|                        | C-H---Br <sub>ax</sub> | 3.080             | 146.50                |
|                        | O-H---Br <sub>eq</sub> | 2.702             | 156.08                |
| O-H---Br <sub>eq</sub> | 2.523                  | 153.29            |                       |

### **Supplementary References**

1. CrysAlisPro, Version 1.171.36.31. Agilent Technologies Inc., Santa Clara, CA, USA 2012.
2. G. M. Sheldrick, *Acta Cryst. A*, 2008, 64, 112–122.
3. O. V. Dolomanov, L. J. Bourhis, R. J. Gildea, J. A. K. Howard and H. Puschmann, *J. Appl. Cryst.*, 2009, 42, 339–341.
4. G. M. Sheldrick, *Acta Cryst. C*, 2015, 71, 3–8.
